# Supplementary material for: Can the Timed and Targeted Counseling Model Improve the Quality of Maternal and Newborn Health Care? A Process Analysis in the Rural Hoima District in Uganda
Source: MDPI journal article supplement (doi:10.3390/ijerph18094410), 2021-04-21
Supplement: s1 [file s1]

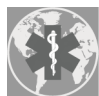

**Supplementary Table S1.** Characteristics of the pregnant women (N=616) and VHTs (N=64) included in the study.

| Sub-County    | Number of Villages | Number of VHTs by Gender | Number of Included Households |
|---------------|--------------------|--------------------------|-------------------------------|
| Bugembe       | 10                 | 8 (M:4, F:4)             | 99                            |
| Buseruka      | 7                  | 8(M:3, F:5)              | 75                            |
| Busisi        | 7                  | 7 (M:2, F:5)             | 69                            |
| Kigorobya     | 7                  | 8(M:5, F:3)              | 81                            |
| Kitoba        | 8                  | 9(M:3, F:6)              | 78                            |
| Lower Kabwoyo | 8                  | 8 (M:6, F:2)             | 79                            |
| Mparo         | 8                  | 8 (M:2, F:6)             | 56                            |
| Lower Kabwoyo | 9                  | 9 (M:5, F:4)             | 79                            |
| Total         | 64                 | 65 (M:30, F:35)          | 616                           |

Note: VHTs = Village Health Team., M = male, F = female.

**Supplementary Table S2.** Quality of care during pregnancy and childbirth.

| Service or Practice                               | %        |                |
|---------------------------------------------------|----------|----------------|
|                                                   | Baseline | Implementation |
| <i>Quality of ANC services</i>                    |          |                |
| Quality of ANC service                            |          | 18.5%          |
| <i>Contributing Services to Quality of ANC</i>    |          |                |
| Woman given folic acid during ANC                 | 28.8%    | 95.8%          |
| Woman given Fansidar (IPT) during ANC             | 78.6%    | 77.9%          |
| Woman tested for HIV and results given            | 91.0%    | 76.0%          |
| Woman given deworming during Pregnancy            | n.a.     | 69.1%          |
| Woman vaccinated for TT once                      | n.a.     | 56.4%          |
| ANC First Trimester                               | 24.4%    | 53.9%          |
| 4th ANC or more                                   | 55.1%    | 52.2%          |
| Woman tested for syphilis                         | n.a.     | 41.9%          |
| <i>Quality of ANC care at home</i>                |          |                |
| Quality of ANC care at home                       |          | 21.6%          |
| <i>Contributing practices to ANC care at home</i> |          |                |
| Woman having adequate rest                        | n.a.     | 81.5%          |
| Woman having extra meal                           | n.a.     | 78.4%          |
| Woman sleeping LLTIN                              | 74.0%    | 49.3%          |
| Hand washing facility at the home                 | n.a.     | 41.8%          |
| <i>Appropriate childbirth practices</i>           |          |                |
| Appropriate Childbirth Practices                  |          | 28.7%          |
| <i>Contributing practices to childbirth</i>       |          |                |
| Woman plans to deliver at Health Facility         | n.a.     | 76.5%          |
| Woman discussed a birth plan                      | 13.2%    | 76.0%          |
| Delivery at the Health Facility                   | 80.0%    | 90.8%          |
| Woman has a clean birthing kit                    | 89.9%    | 49.9%          |
| <i>Quality of Newborn care at home</i>            |          |                |
| Newborn care at home                              |          | 29.2%          |
| <i>Contributing practices to newborn care</i>     |          |                |
| Mother visited during the 1st week                | n.a.     | 89.6%          |
| Baby sleeping under an LLTIN                      | 74.9%    | 86.8%          |
| Baby practicing exclusive breastfeeding           | 60.9%    | 85.5%          |
| Baby suckling well                                | n.a.     | 79.4%          |
| Birth weight record                               | n.a.     | 63.6%          |
| Vaccination                                       | n.a.     | 48.2%          |

Note: ANC: Antenatal care; LLTIN: Long-lasting insecticide-treated mosquito net; IPT: Intermittent presumptive treatment of malaria; TT: Tetanus Toxoid vaccination; n.a.: Not assessed.

**Supplementary Table S3.** Services and practices during pregnancy.

| Variables                          | ANC 1 (596) |       | ANC 2 (528) |       | ANC 3 (426) |       | ANC 4 or more (311) |       |
|------------------------------------|-------------|-------|-------------|-------|-------------|-------|---------------------|-------|
|                                    | N           | %     | N           | %     | N           | %     | N                   | %     |
| Goal-oriented ANC services         |             |       |             |       |             |       |                     |       |
| TT vaccination for the mother      | 292         | 49.0% | 216         | 40.9% |             |       | NA                  |       |
| HIV testing & results received     | 388         | 65.1% | 294         | 55.7% | 207         | 48.6% | 14                  | 4.5%  |
| Woman given IPT (Fansidar)         | 297         | 49.8% | 332         | 62.9% | 234         | 54.9% | 26                  | 8.4%  |
| Woman given folic acid             | 501         | 84.1% | 458         | 86.7% | 373         | 87.6% | 282                 | 90.7% |
| Woman given dewormers              | NA          |       | 360         | 68.2% | 265         | 62.2% | NA                  |       |
| Woman tested for syphilis          | NA          |       | 225         | 42.6% | 143         | 33.6% | NA                  |       |
| Practices at Home during Pregnancy |             |       |             |       |             |       |                     |       |
| Woman sleeping under LLITN         | 150         | 25.2% | 174         | 33.0% | 18          | 4.2%  | 0                   | 0.0%  |
| Woman having adequate rest         | 108         | 18.1% | 144         | 27.3% | 169         | 39.7% | 282                 | 90.7% |
| Woman eating an extra meal         | 109         | 18.3% | 136         | 25.8% | 161         | 37.8% | 274                 | 88.1% |
| Handwashing facility available     | 55          | 9.2%  | 67          | 12.7% | 86          | 20.2% | 160                 | 51.4% |

Note: LLITN: Long-lasting insecticide-treated mosquito net; IPT: Intermittent presumptive treatment of malaria; TT: Tetanus Toxoid vaccination; ANC: Antenatal care; NA: Not assessed.

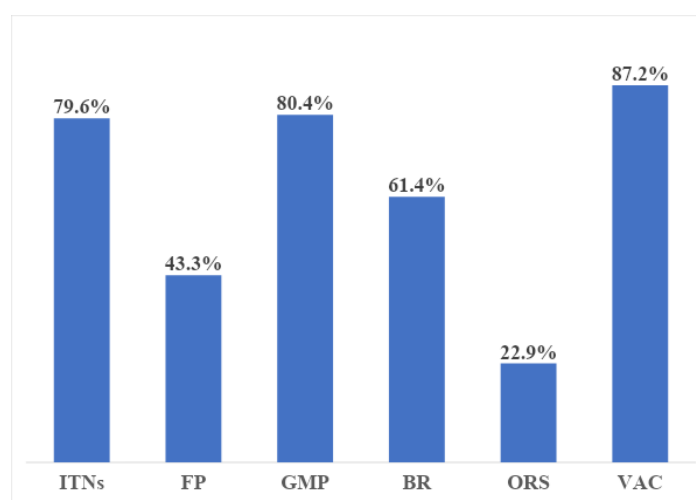

**Supplementary Figure S1.** Newborn care at 6 weeks after childbirth. ITNs: Baby sleeping under an insecticide-treated mosquito net; FP: Mother prepared to use family planning method; GMP: Child Health Card plotted at immunization; BR: Baby and mother practicing exclusive breastfeeding; ORS: Mother taught how to prepare ORS for diarrhea care; VAC: Baby vaccinated for Polio 1, and DPT.

**Supplementary Table S4.** Results of a Chi-Square test on the 5 outcome variables.

| Indicator                    | Number and Percentage |            | p-value |
|------------------------------|-----------------------|------------|---------|
|                              | Baseline              | Outcome    |         |
| First ANC in first trimester | 168(24.3%)            | 321(53.9%) | <0.001  |
| Quality of ENC               | 1(0.5%)               | 159(29.2%) |         |
| Quality of ANC               | 3(0.4%)               | 111(17.9%) |         |
| Exclusive breastfeeding      | 125(60.0%)            | 465(85.5%) | 0.153   |
| 4th or more ANC              | 381(55.1%)            | 311(50.5%) |         |

Notes: ANC; Antenatal care, ENC: Essential newborn care.
